# Supplementary material
Source: Copernicus journal article supplement (doi:10.5194/egusphere-2023-2049)
Supplement: Supplementary file [file egusphere-2023-2049-AC1-supplement.pdf]

RC2

## ## Overview

The manuscript from Martins and colleagues makes an exhaustive description of the 2022 heatwave in Europe with a specific focus on how land surface temperatures (LST) from geostationary satellite can provide valuable information to describe such event. The manuscript is well-written and well-documented. It may sometimes reads a bit too much like a weather report rather than a scientific paper, and it does not bring major novel scientific insights, but overall is informative enough to merit publication if some points are considered.

Dear Gregory Duveiller, thanks a lot for the generally positive feedback. We appreciate the time you took to review our paper and your valuable comments.

The big question is actually 2023. It is a pity that the process of scientific analysis, writing and reviewing takes so long, and I fully understand that the authors had the intention to focus on 2022 before the summer conditions of 2023 came about. But now we are in December 2023 and arguably all the information to add 2023 to the current analysis could be done. It is true that this may somewhat complicate the message, as 2023 may show to be even more extreme than 2022 in some areas, but also maybe not. I would urge the authors to consider to add 2023 also to the analysis (at least in Figure 9 and maybe 10) to ensure their analysis does not become a bit obsolete before it is even published. Additionally, I would ensure something is said about 2023 in the discussion/conclusion.

The reviewer is right in the points raised here. Adding information on 2023 is indeed informative but also complicates the message, as pointed out. We included information on 2023 but do not treat it with any particular highlight, since overall, from the LST perspective, 2022 is still exceptional even when 2023 is considered. Also from the 2m temperature perspective, and according to the information provided by the Copernicus Climate Change Service, summer 2023 over Europe ranks as the fifth warmest year on record (<https://climate.copernicus.eu/summer-2023-hottest-record>).

As suggested, the following changes were made:

- 2023 was included in the (new) Figure 9 (Time series of the percentage of land area affected by  $M_d > 2$  (...)). Please see the new figures in the bottom of the document. L421 now reads "(...) together with the corresponding data from the individual years from 2004 to 2023 (...)". Since there is not much to say about that particular year, no further changes in the text associated to this figure were introduced.
- 2023 was included in the new Figure 10 (Ranking of summers over the study period (...)). L429 now reads: "In Figure 109, all the summers in the LST data record (2004-2023) are ranked (...)". Again no further considerations were made given the low positions in the different rankings for 2023.
- 2023 was included in the new Fig 11 (Year where the record maximum average LSTMax occurred (...)). Here a few changes were made in the overall description. L453-464 now read "In the JJA anomaly, new maxima were set for large areas of Northern Iberia, France, Southern Germany, Italy and Hungary (in bright cyan). These areas have strong signals over the individual monthly maps as well. The 2018 (dark

grey) heatwave still holds the record for large parts of North Central Europe (Hoy et al., 2020), while the 2010 (red) heatwave set the overall record over Russia (Barriopedro et al., 2011). In the June map, the 2019 (light grey) heatwave introduced records for this month over a large part of North Central Europe, while 2023 (light blue) set new records for Northern France and the Benelux area. In July, 2022 (bright cyan) set new monthly records over South Central Europe, 2006 (orange) set the July record for large areas from France to the Baltic countries, while the in the north Central Europe the record was set by the 2018 (dark grey) heatwave. In August the year 2022 set new records for large areas from northwest Portugal, to France and the British Isles up to the Baltic countries. The 2015 (light brown) heatwave still holds the record for August over areas such as Poland, Belarus and west Ukraine. It is worth noting that 2003 set JJA temperature records over large areas of Western Europe (Sousa et al., 2020; Lhotka et al., 2018), but since that year is not within the period covered by the LSA-SAF LST dataset, it does not show up in 11."

- Sentence was added to the conclusions L482-484 "This study also showed that despite some areas in June and August had their highest monthly anomalies in 2023, the 2022 summer as a whole remains as exceptionally warm, ranking in first in all considered metrics."

While LST\_max is seen to have differences with T2M\_max and SKT\_max, which is interesting and informative, I think this analysis could be pushed a bit more to give a bit more insight of these difference. Specifically these seems to scale with magnitude, and it would be wise to try to qualify/visualize this to provide some info on the non-linearity of the relationship. I would thus strongly recommend some graph maybe showing the deltas of all pixels on the y-axis and the magnitude of each pixel on the x-axis (for both T2M and SKT separately)

Indeed the suggested analysis was missing, thank you for asking for it. The proposed plot is provided below (please, see end of document).

The following text was added to the end of section 3.2, together with the new figure L324-335: "In Figure 5, the temperature differences are further analyzed as a function of the absolute LST\_Max. Their behaviour is somewhat consistent across the absolute LST\_Max range. For instance, for lower LST\_Max, both differences are small and negative. A large part of this can be explained by persistent clouds, which if undetected, could introduce a negative bias in LST (Martins and Dutra, 2022; Trigo et al., 2021; Martins et al., 2019). These situations are however relatively infrequent. For mid-range LST\_Max, differences are generally positive, with larger LST\_Max-T2m-Max, especially in July when they reach around 2°C. For LST\_Max around 45-55 °C, temperature differences are relatively lower, but they increase again for very high LST\_Max".

On another take, I was quite interested in knowing more about the specific performance and appropriateness of the all-sky LST (versus the clear-sky LST). It seems that it is a bit taken from granted that it is assumed to be better (because more gap-filled). However, this paper could be the nice opportunity to evaluate better how it performs against the clear-sky in terms of relationship with other indices (SKT\_max, T2M\_max), and thereby giving an extra relevance for this paper.

Indeed a paper focusing on an extended validation of the product is missing (it is in preparation by the team). But it is not exactly true that no validation has been performed. A feasibility study by Martins et al (2019) already performed a validation of a preliminary version of this product against 3 in situ stations specifically designed for LST validation and compared to another all-sky LST product from AMSR-E. Furthermore, a validation report was approved internally by EUMETSAT after careful external review (a pre-requisite for product release), where an exhaustive comparison against 33 stations from several land monitoring networks and to ERA5-Land skin temperatures. This report is available at the LSA-SAF website and is already cited in the manuscript. Again, we decided to go forward with this manuscript after formal release of the product, but without waiting for the publication of the validation paper, due to the exceptionality of the event and because we assumed the validation report already provided enough information to the interested reader. Moreover, the dataset used for the cloudy-sky SKT derived from a surface energy balance scheme has been published (Barrios et al. 2024, <https://doi.org/https://doi.org/10.1002/gdj3.235>). This reference has been added, see below.

From the presentation point of view, figures would be clearer and more accurate using an appropriate geographical projection for Europe which respects the concept of equal area, thereby showing better the extent of the meteorological event described in this paper. I would recommend to use the Inspire LAEA for Europe.

Thank you for your suggestion. Figures were adapted to use the suggested projection.

When answering to this comment, we decided to slightly change the domain (now limiting the upper limit to 60N). We have also applied tighter quality control when computing the monthly means. Both of these modifications led to slight differences in the reported values and even in the relative position of each year in the rankings of Fig 9 (Fig 10 in the new manuscript). In section 2.5 this is now explained L194-195: “When computing monthly means, it was ensured that at least 85% of the days in each month were available. This prevents spurious values in the disk edge to contaminate the monthly value.”

## Specific comments...

- L60 : "led to twice the yield", do you mean increase in yield?

Sorry if this was unclear. The sentence was rephrased L58-60: “The combined effects of drought and extreme heat also led to a wide range of economic impacts, namely an overall crop loss (particularly cereal) of 9% with respect to the previous years’ five-year average production (FAO, 2022), causing a generalized increase in food and grocery prices”

- L72: yes, but this does not relate necessarily to NRT in general

Not sure what you mean here. EUMETSAT is indeed making efforts to increase the usage of their datasets on climate applications (e.g., <https://www.eumetsat.int/what-we-monitor/climate>, <https://www.eumetsat.int/what-we-do/monitoring-climate>, <https://www.eumetsat.int/climate-data-records>, last visited in 7 January 2024)

- L86: perhaps it would be welcome here to add briefly a bit more on how this all-sky is produced, or rather, how come this is not the standard? what assumptions are being made to estimate what is below the clouds? I know this is explained later, but a word or two talking about energy balance would fit well

Indeed. Added L99-102: LSTs under cloudy conditions are estimated using a surface energy balance scheme (Barrios et al., 2024), which is used at the LSA-SAF to estimate evapotranspiration and surface turbulent fluxes along with the cloud-sky LST. The scheme uses radiation flux and vegetation products from the LSA-SAF, H-SAF soil moisture and a few screen-level variables from ECMWF as main inputs."

- L101: perhaps good to mention how many MSG satellites there are

Indeed, L120 corrected to "onboard the four Meteosat Second Generation Satellites"

- L114: what does overall accuracy of 0K mean here exactly? it reads as if there is no error whatsoever. is it not rather that you mean there is no bias?

We are using the terminology proposed by the Committee on Earth Observation Satellites Working Group on Calibration and Validation Land Product Validation Subgroup in the Land Surface Temperature Product Validation Best Practice Protocol (Guillevic et al., 2018). We would rather stick to that terminology. However, we added L133 "(bias)" in the text as suggested, for increased clarity.

- L117: which meteo variables from ERA5 are needed?

Information is included as follows L129-130 "and screen-level meteorological variables (including 2 m temperatures, 2 m dewpoint temperature, 10 m winds and surface pressures) from the European Centre for Medium-Range Weather Forecasts (ECMWF).

- L169: please make it explicit here that this is how you define "hot days" in this paper. It did not seem so clear to me later on that the definition was here

Rephrased to L200 "These days where P90 is exceeded are hereafter referred to as *hot days*."

- Figure 2: in panel a, please change the colourscale as this one is not colourblind friendly

We selected a new colorscale, hoping the problem is now mitigated. Please see new set of figures in the end of this document.

- L269: I suppose the fact LAI is prescribed should also be mentioned here

Corrected to L297 "physiographic fields such as vegetation cover/LAI (which are static)"

- Figure 4: would be nice to relate this with absolute values of LST\_max/T2M\_max. Are the deviations larger particularly where the temperatures are larger? it would surely seem so.



We hope that the answer to the 2<sup>nd</sup> major point answers to this.

- Figure 7: the colourscale on the right column of figures is also not ideal for colourblind people as it goes from green to red.

The new figure version uses the same colorbar for both columns

- Figure 8: graphically it is difficult to appreciate how the corresponding areas are for non-2022 years, as these are not full. I wonder if there would not be a way to make things more comparable. Maybe shading also (with different colours maybe) the 3 next years with the largest cumulated max Area under  $Md(Td) > 2$ .

The idea of this plot is not actually to focus on areas under curves. The reviewer's suggestion made the plot confuse, because there are many years under comparison. We prefer to leave the plot as it was (but including information for 2023). We acknowledge that the comparison of the areas under the curves are indeed relevant, which is why they are directly compared in the ranking figure. The idea here is to focus on the time dimension, by following the evolution of the proportion of land area under extreme heat conditions (which are defined here as pixels with  $Md > 2$ ).

- Figure 9: it would really be interesting to add 2023 on this graph

Done.

**New plots:**

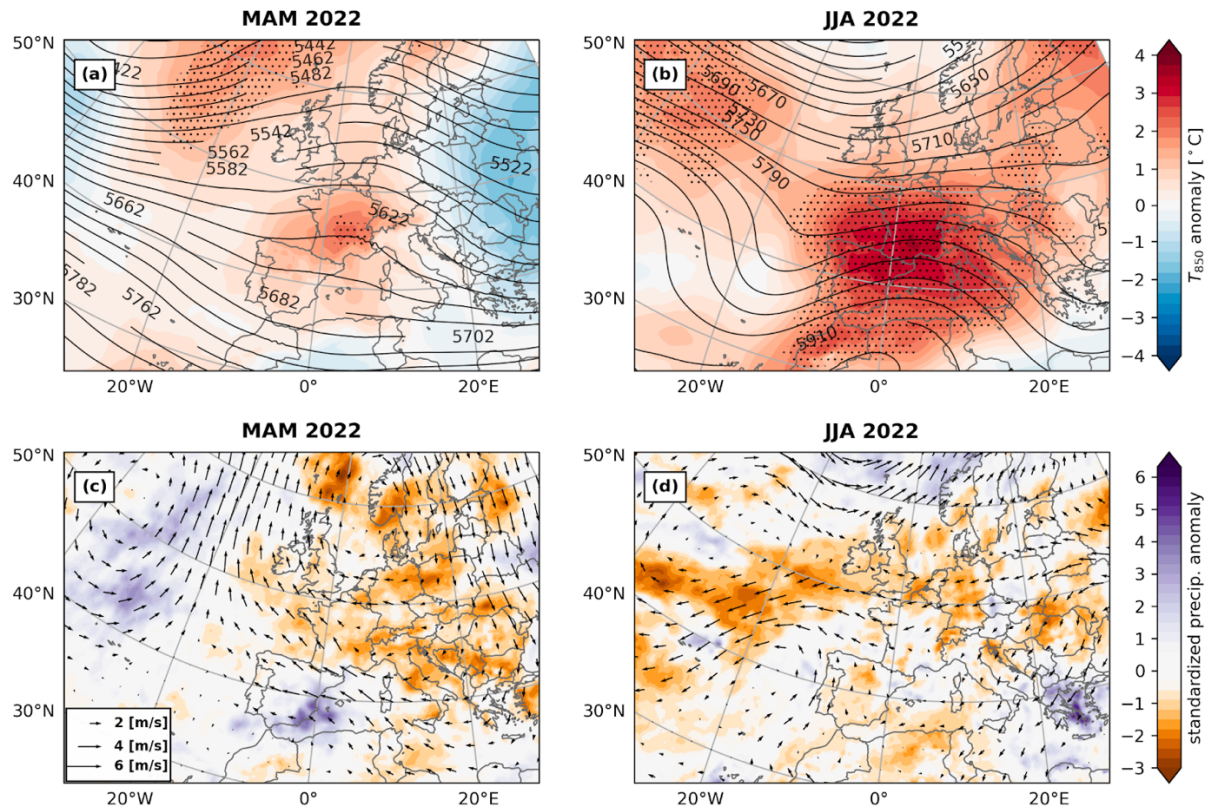

Figure 1 Panels representing the anomalies of the synoptic atmospheric configuration over Europe for two seasons in 2022, as given by ERA5: MAM (panels (a) and (c)) and JJA (panels (b) and (d)). Panels (a) and (c) show  $T_{850}$  anomalies (in colour), and  $Z_{500}$  (black contours). Dotted areas denote areas where  $T_{850}$  was above its 95<sup>th</sup> percentile. Panels (b) and (d) show the normalized anomaly of accumulated precipitation (in colour) and  $\vec{v}$  anomalies (black arrows). Dotted areas denote areas where  $\text{precip}$  anomaly was below the 10<sup>th</sup> percentile. All anomalies were computed with respect to the 1981-2022 reference period. Arrows are spaced  $2^\circ \times 2^\circ$  for the sake of readability.

Fig 2

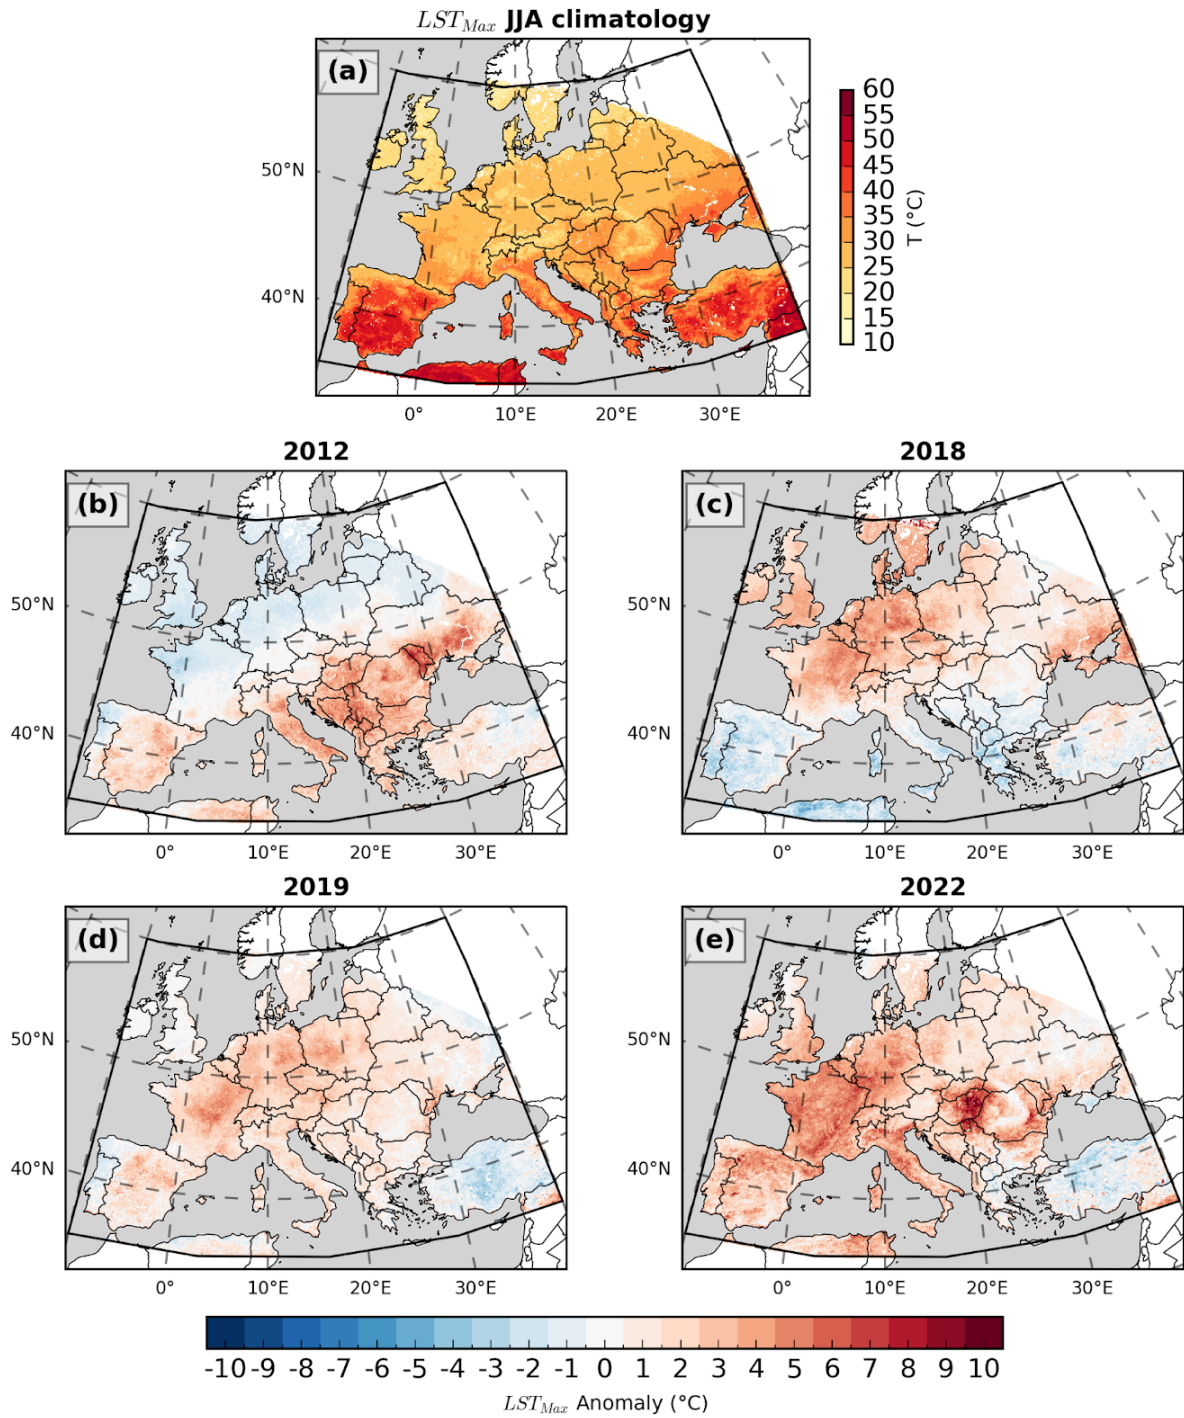

Figure 2 - (a) JJA median of  $LST_{Max}$  for the period 2004-2021, while (b, c, d, e) are seasonal  $LST_{Max}$  anomalies for 2012, 2018, 2019 and 2022.

Fig 3

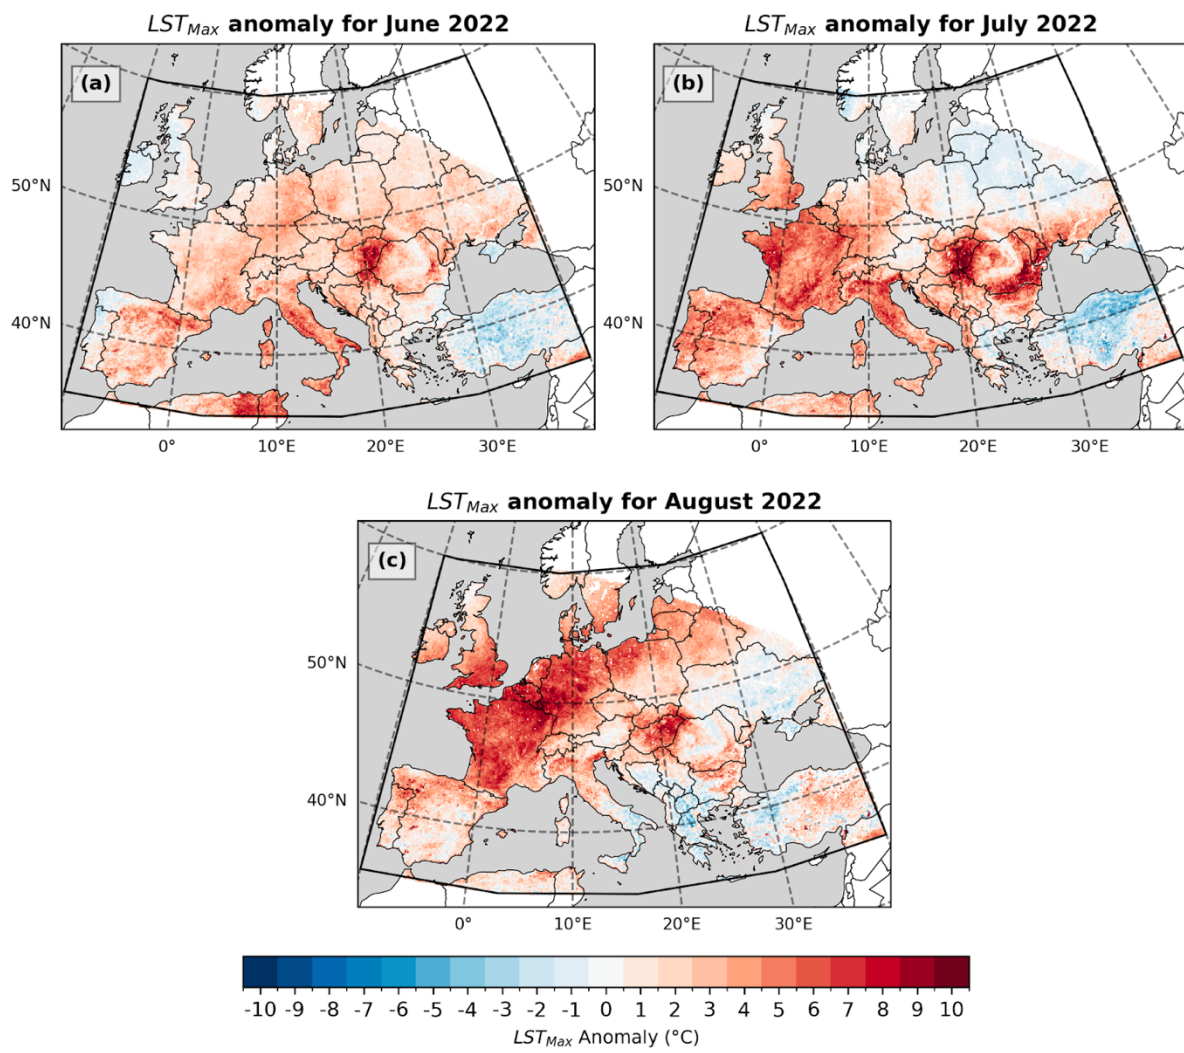

Figure 3 --  $LST_{Max}$  monthly anomalies for (a) June, (b) July and (c) August 2022 over Europe.



Fig 4

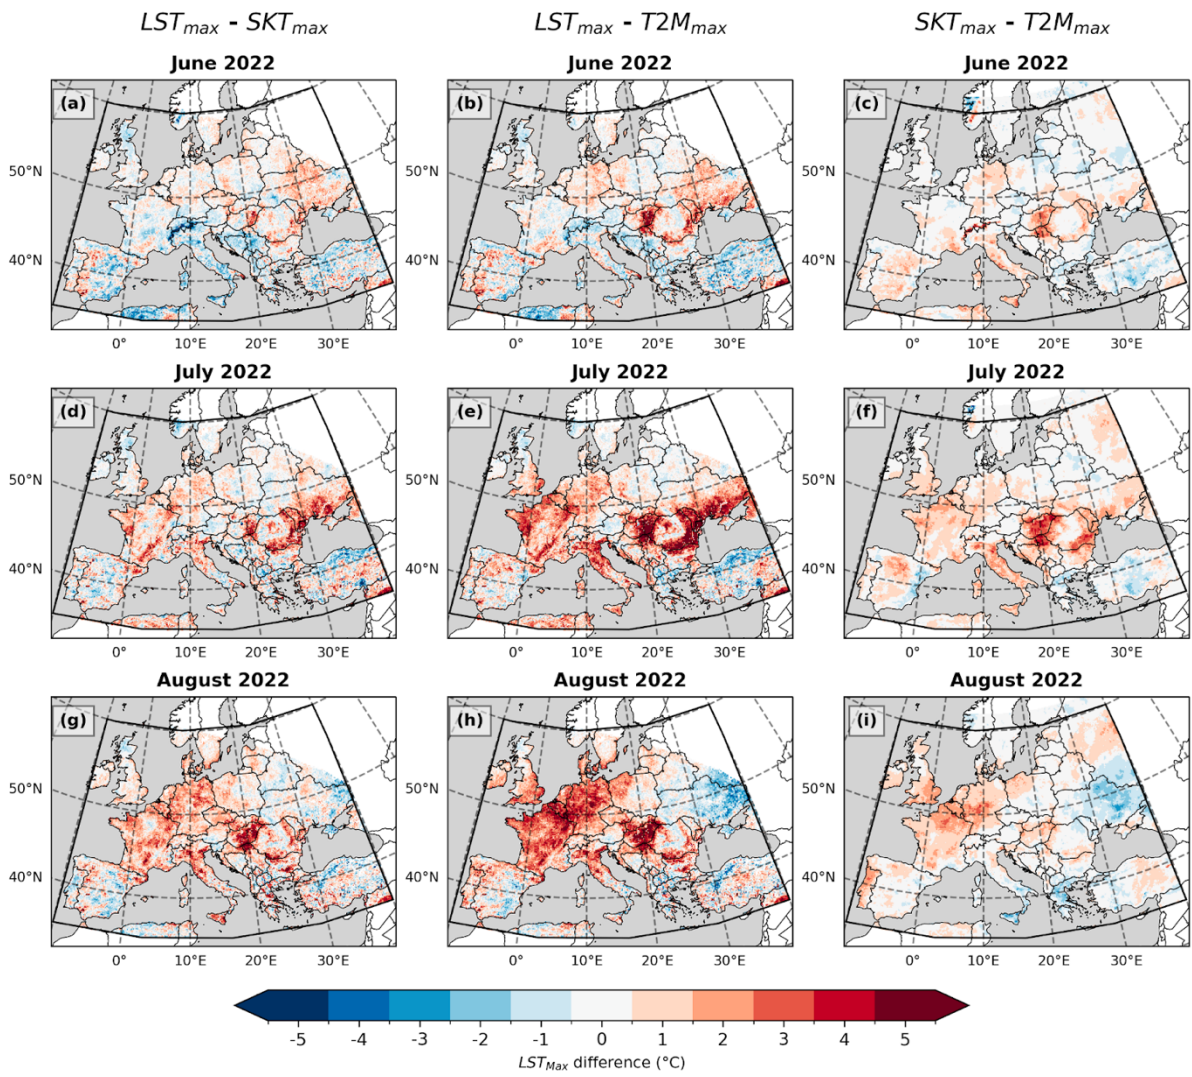

Figure 4 - Comparison between  $LST_{max}$  monthly anomalies and the corresponding anomalies using reanalysis  $SKT$  (left) and  $T2m$  data (right). Comparisons are made for June (a, b), July (c, d) and August (e, f).

Fig 5

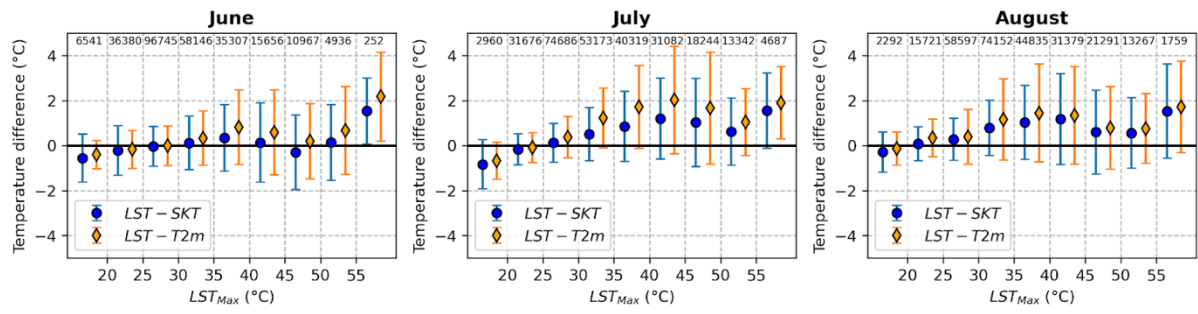

Figure 5 - Mean differences between  $LST_{Max}$  and  $SKT_{Max}$  (orange, diamonds) anomalies and between  $LST_{Max}$  and  $T2m_{Max}$  (blue, circles) anomalies as a function of mean  $LST_{Max}$ , for June (left panel), July (center panel) and August (right panel). On top, the number of pixels used in the calculation. Whiskers represent the standard deviation over each interval.

Fig 6

### Summer 2022 Number of Hot Days

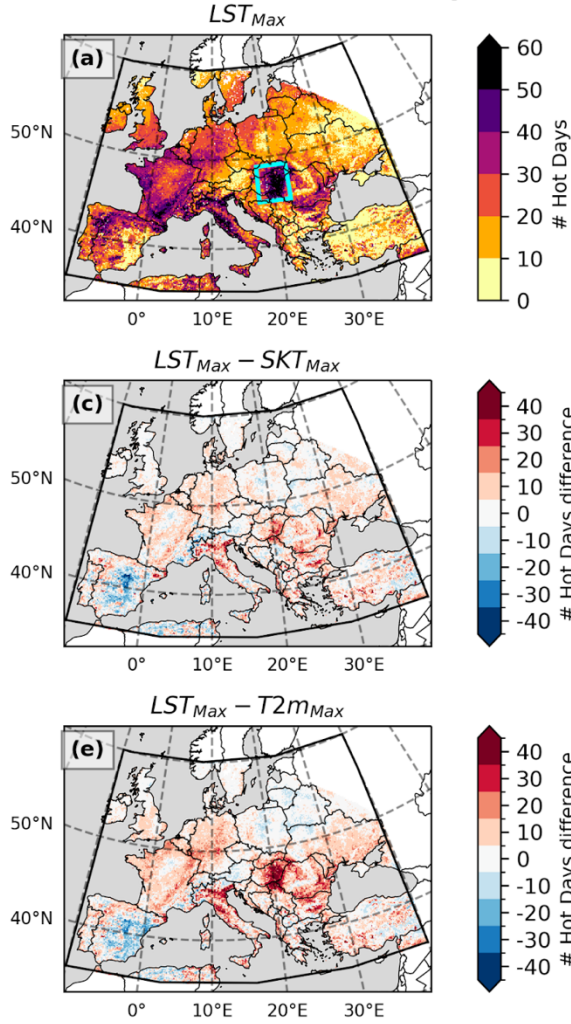

### Summer 2022 HWMI

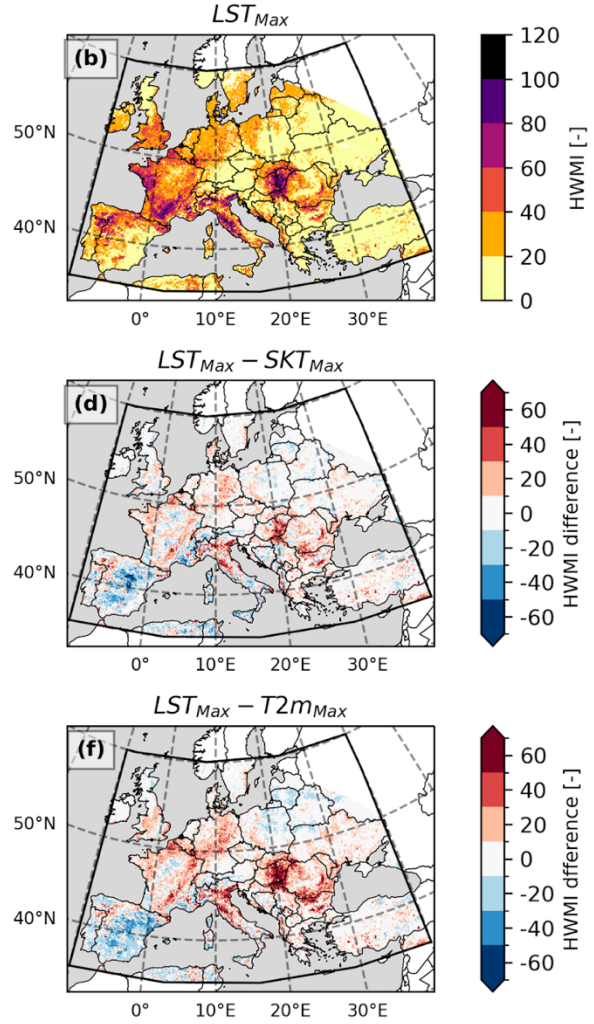

Figure 6- (a) Number of JJA hot days detected using the  $LST_{Max}$  (i.e., days when  $LST_{Max} > P_{90}$ ). (b) Total JJA HWMI derived with  $LST_{Max}$ . (c, e) Differences between the number of Hot Days obtained with  $LST_{Max}$  and with  $SKT$  and  $T2m$ , respectively. (d, f) Difference to the  $SKT$ -based HWMI and  $T2m$ -based HWMI, respectively. The blue square in (a) denotes the area used for the extraction of timeseries data which are analysed below.



Fig7 (same as previous fig6)

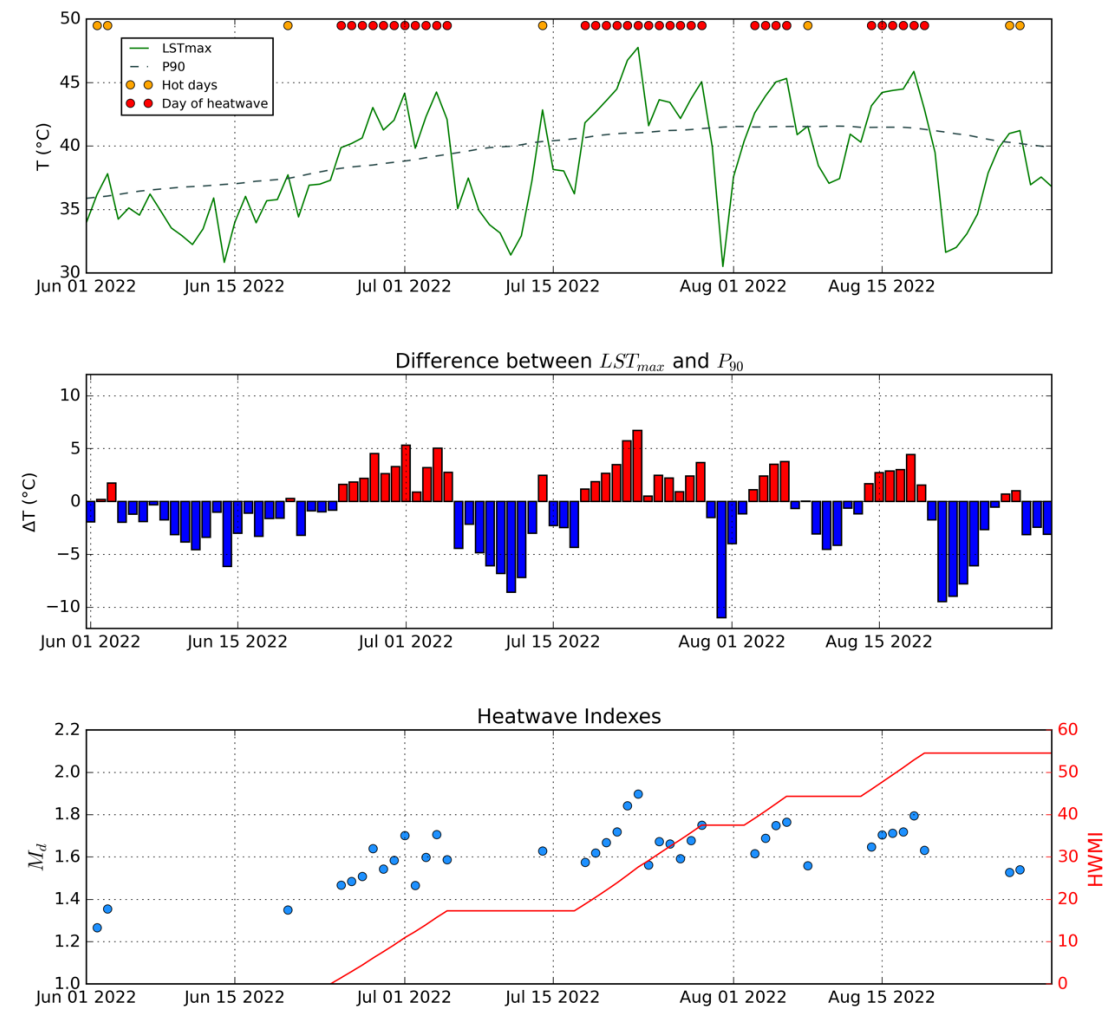

Figure 7- (top) Evolution of  $LST_{max}$  (green curve) and the respective  $P_{90}$  (dashed curve). Hot days are marked as a yellow circle at the top; if they belong to a heatwave (set of 3 or more consecutive days), they are marked as a red circle. (middle) Explicit differences between  $LST_{max}$  and the  $P_{90}$ . (bottom) Daily heatwave magnitude,  $M_d$  is in blue and the accumulated HWMI is in red, with values in the right axis. All data are area averages from the blue box in Figure 6.

Fig 8

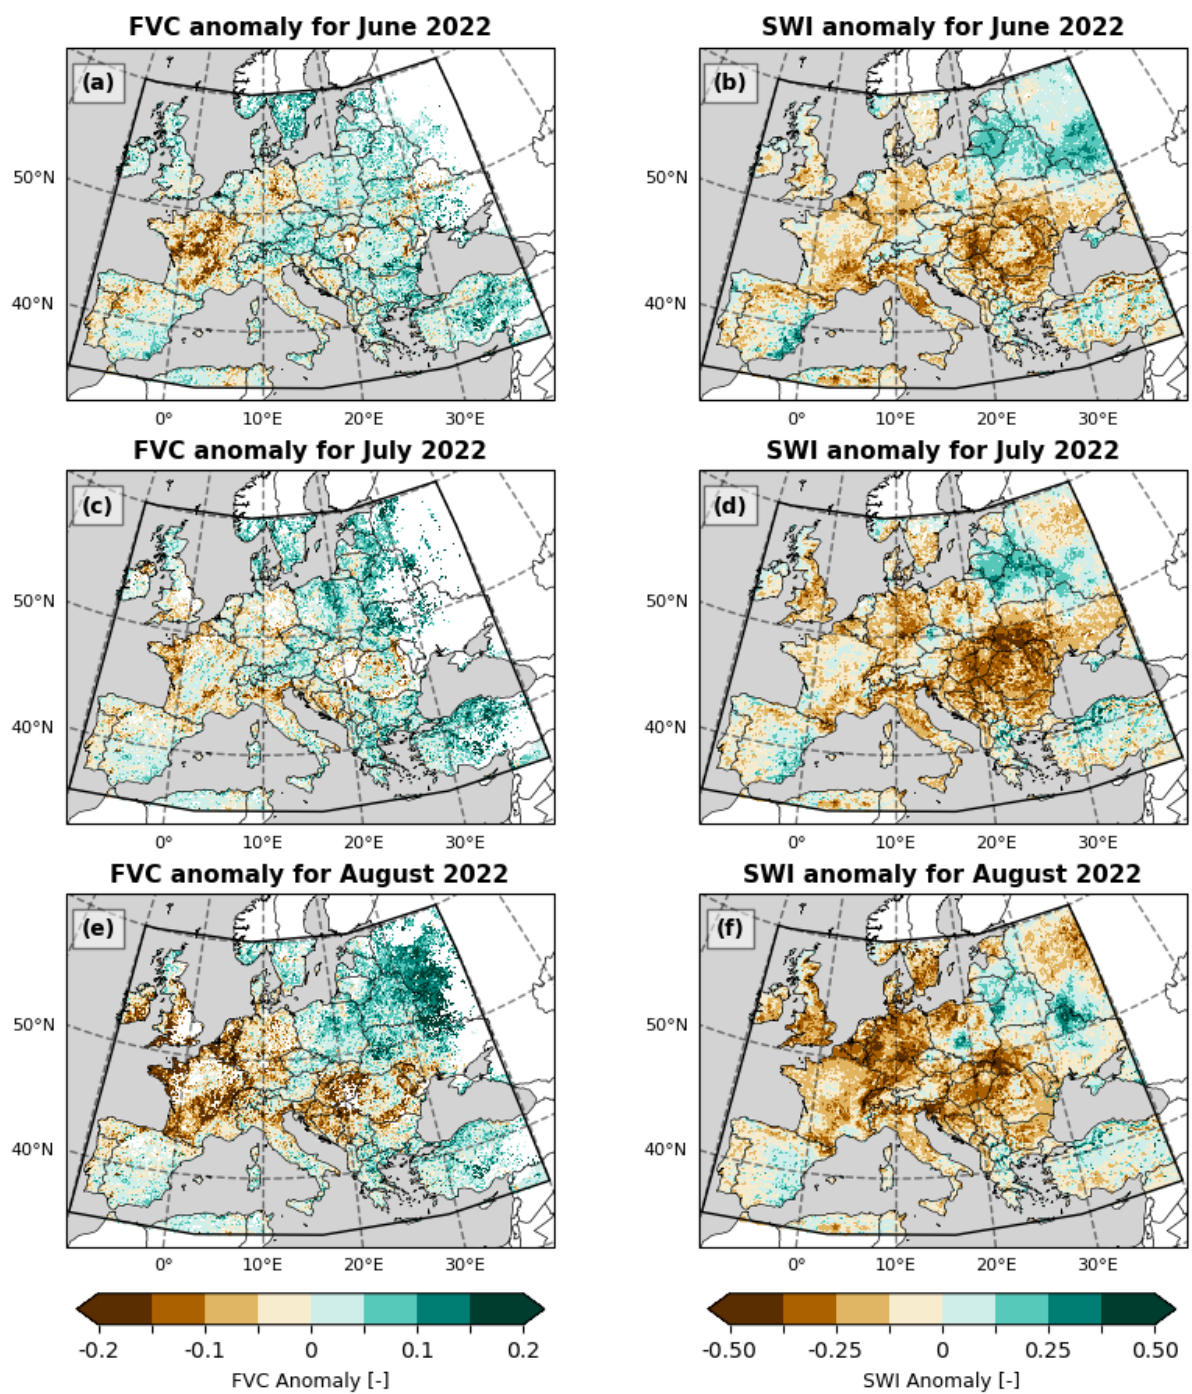

Figure 8- (left) *FVC* monthly anomalies and (right) *SWI*, for June (top), July (middle) and August (bottom). Reference period is 2004-2021.

Fig 9

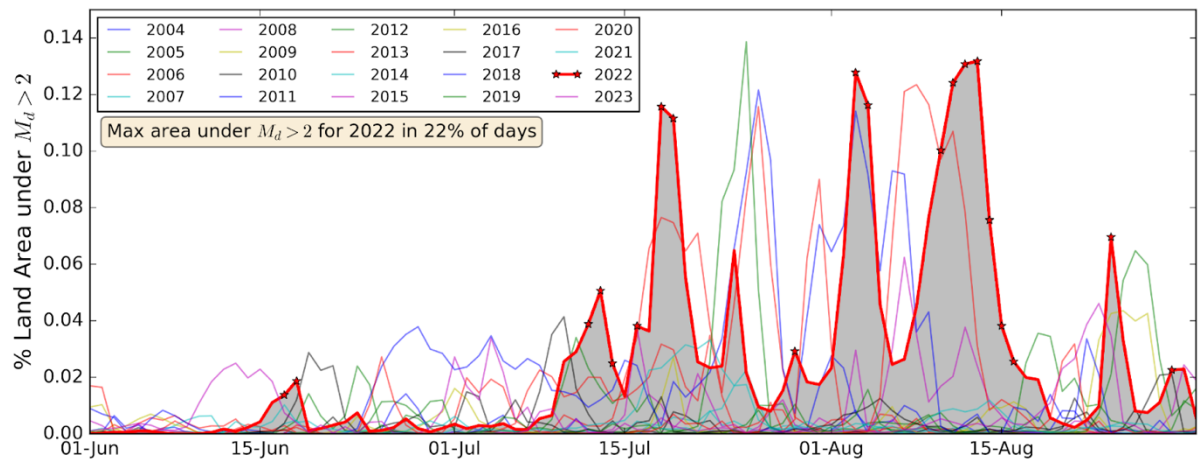

Figure 9 - Time series of the percentage of land area affected by  $M_d > 2$ , from June 1<sup>st</sup> to August 31<sup>st</sup>. The red bolder curve represents 2022 data, while other colors represent the same variable for the other years in the data record. Stars mark the days where the area where  $M_d > 2$  in 2022 was the greatest over all years.

Fig 10

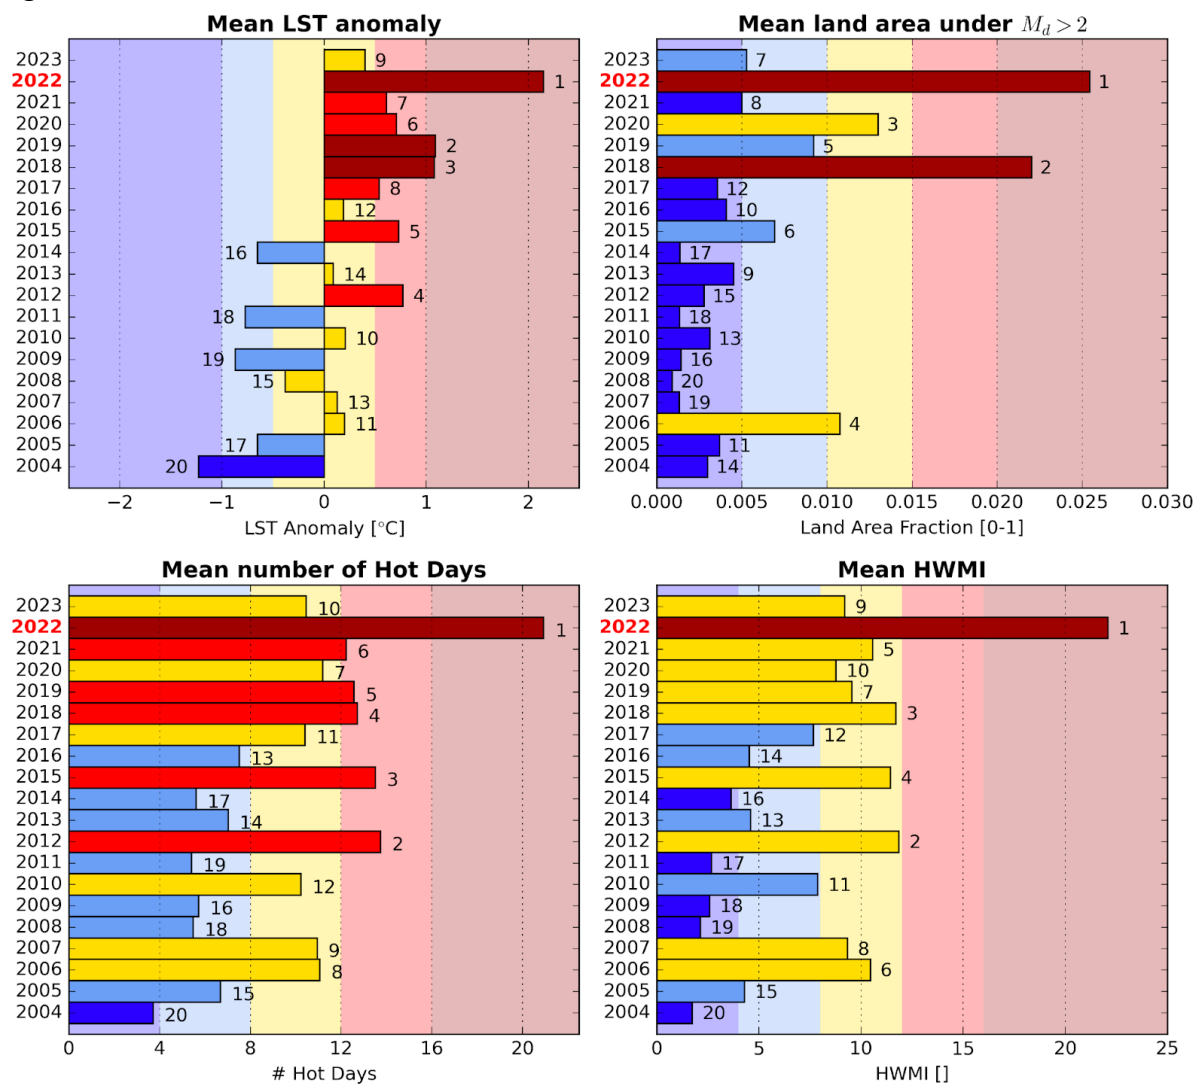

Figure 10 - Ranking of summers over the study period according to (left) their mean  $LST_{max}$  anomaly, (middle) the average fraction of area covered by extreme heat conditions ( $M_d > 2$ ) and (right) area-averaged HWMI. Colours are mainly for illustrative purpose, where each year was classified according to the severity associated to each parameter (from less severe in blue to extremely severe in dark red).

Fig 11

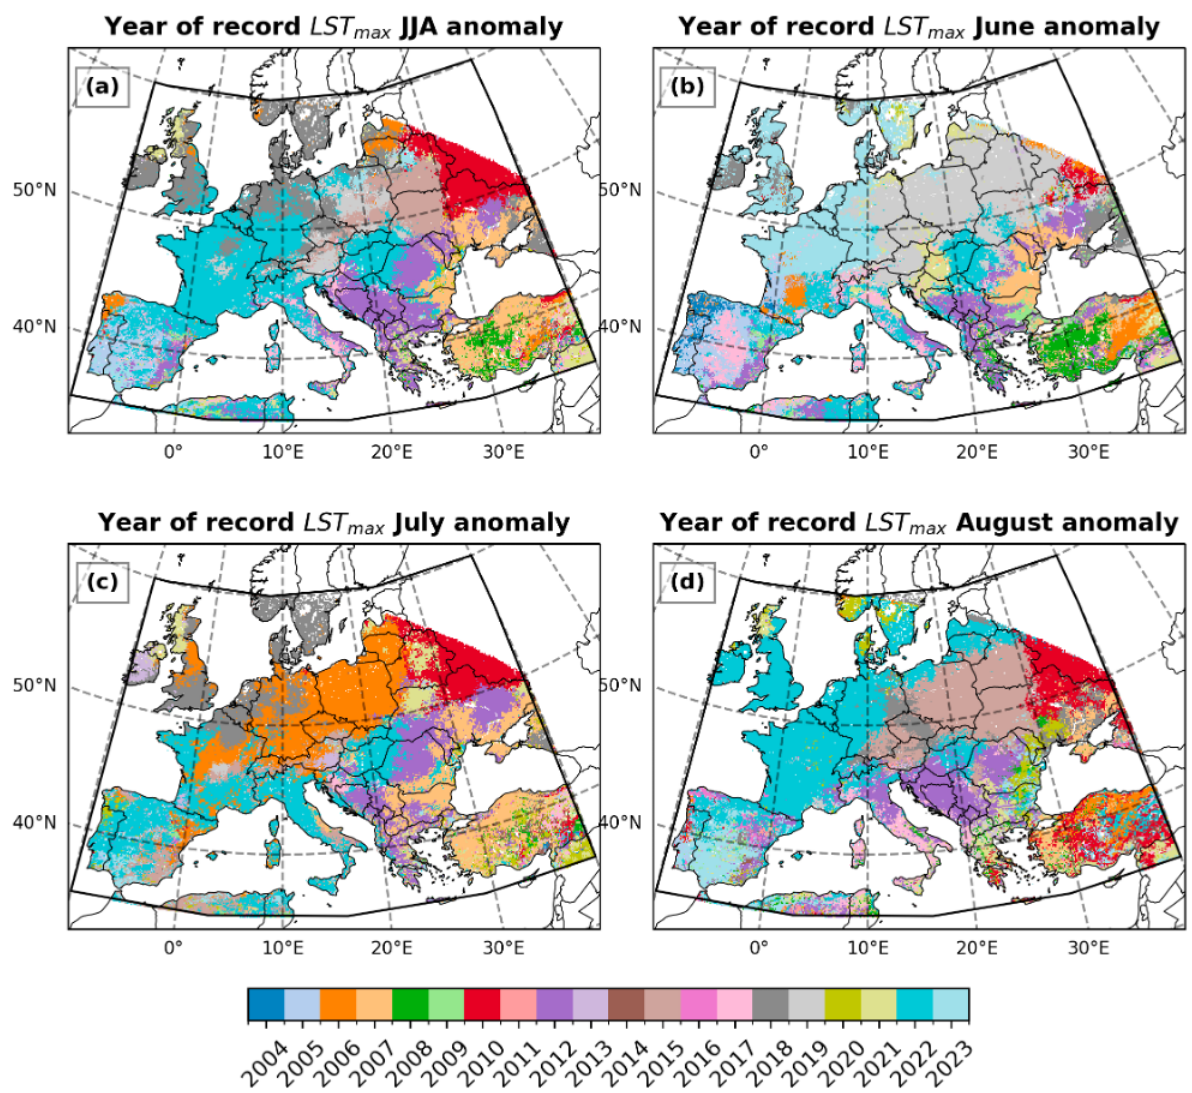

Figure 11 - Year where the record maximum average  $LST_{Max}$  occurred for the periods (a) JJA (b) June (c) July and (d) August.
